# Supplementary material for: A Simple Screening and Optimization Bioprocess for Long-Chain Peptide Catalysts Applied to Asymmetric Aldol Reaction
Source: MDPI journal article supplement (doi:10.3390/molecules28196985), 2023-10-09

# A Simple Screening and Optimization Bioprocess for Long-Chain Peptide Catalysts Applied to Asymmetric Aldol Reaction

Shulin Wang, Haidong Teng, Lan Wang, Pengcheng Li, Xinghao Yuan, Xi Sang, Jianping Wu, Lirong Yang and Gang Xu \*

College of Chemical and Biological Engineering, Zhejiang University,  
Hangzhou 310058, China

\* Correspondence: xugang\_1030@zju.edu.cn

## Supporting Information

### Table of Contents

|                                                                   |   |
|-------------------------------------------------------------------|---|
| S1. The original sequence of pET-17b(+) plasmid .....             | 2 |
| S2. Primers used in this study .....                              | 3 |
| S3. The resulting sequence of pET-17b(+)-LmrREKP2 plasmid .....   | 3 |
| S4. Agarose gel electrophoresis analysis .....                    | 4 |
| S5. SDS-PAGE analysis .....                                       | 5 |
| S6. MS analysis of peptide2.....                                  | 5 |
| S7. Chiral HPLC analysis .....                                    | 5 |
| S8. <sup>1</sup> H NMR analysis .....                             | 8 |
| S9. Some pictures documenting the process of the experiment. .... | 8 |

## S1. The original sequence of pET-17b(+) plasmid

acgccgggcaagagcaactcggcgccgcatacactattctcagaatgacttggtgagtactaccagtcacagaaaagcatcttacggatg  
gcatgacagtaagagaattatgacgtgctgccataaccatgagtataactgcggccaacttactctgacaacgatcggaggaccgaag  
gagctaaccgctttttgcacaacatgggggatcatgtaactgccttgatcgttgggaaccggagctgaatgaagccataccaaacgacgag  
cgtgacaccacgatgcctgcagcaatggcaacaacgttgcgcaactattaactggcgaactacttactctagcttcccggcaacaattaatag  
actggatggaggcgataaagttgcaggaccacttctgcgctcgccctccggctggctggtttattgctgataaatctggagccggtgagc  
gtgggtctcgcggtatcattgcagcactggggccagatggtaagccctcccgtatcgtagtattctacacgacggggagtcaggcaactatgg  
atgaacgaaatagacagatcgtgagataggtgcctcactgattaagcattggtaactgtcagaccaagttactcatatatactttagattgattt  
aaaaattcatttttaatttaaaaggatctaggtgaagatccttttgataatctcatgacaaaatcccctaacgtgagtttctgctcactgagcgta  
gaccccgtagaaaagatcaaaggatcttctgagatcctttttctgcgcgtaactctgctgctgcaaaaaaaaaccaccgctaccagcggt  
ggtttgttgcgggatcaagagctaccaactcttttccgaaggtaactggcttcagcagagcgcagataccaataactgtccttctagtgtagcc  
gtagttaggccaccactcaagaactctgtagcaccgcctacatacctcgtctgtaactctgttaccagtggtgctgccagtggtgataagt  
cgtgtcttaccgggttgactcaagacgatgttaccggataaggcgcagcggctgggctgaacggggggtcgtgcacacagcccagctt  
ggagogaacgacctacaccgaactgagatacctacagcgtgagctatgagaagcggccagcttcccgaagggaagcgggacaggt  
atccgtaagcggcagggtcggacaggagagcgcagagggagcttccaggggaaacgcctggtatctttatagtctgtcgggttctg  
ccacctgtgactgtgagcgtcgtatgtgtgctcgtcagggggcgagcctatgaaaaacgccagcaacgcggccttttaccggttctg  
gccttttctggtccttttctcacatgttcttctgcgttatccctgattctgtggataaccgtattaccgcttctgagtgtgagctgataccgtcgc  
cgcagccgaacgaccgagcgcagcagtgagtgagcaggaagcggagagcgcctgatgcggtatttctccttacgcactgtgctggta  
ttcacaccgcataatgtgacactctcagtacaatctgctctgatgccgcatagttaagccagtatacactccgctatcgtactgtggtc  
atggctgcgccccgaccccgccaaccccgctgacgcgcctgacgggcttctgctgctcccgcatccgcttacagacaagctgtgaccg  
tctccgggagctgcatgtgtcagaggttttaccgctacaccgaaacgcgcgaggcagctgcggtaagctcagcgtggtcgtgaagc  
gattcacagatgtctgctgttcacccgctccagctcgttgaatttctccagaagcgttaatgtctggttctgataaagcgggcatgttaagg  
gcgggttttctggttgcactgatgcctccgtgaagggggatttctgttcatgggggtaataccgatgaaacgagagaggatgctcacg  
atacgggttactgatgatgaacatccccgttactggaacgttgtgagggtaacaactggcggtatggatgcggcgggaccagagaaaaat  
cactcagggtcaatgccagcgttctgtaatacagatgtaggtgtccacagggtagccagcagcatcctgcgatgcagatccggaacataat  
ggtgcaggcgctgacttccgcttccagactttacgaaacacggaaccgaagaccattcatgttgtgtcaggtgcgagacgttttgcag  
cagcagtcgttcacgttcgctcgcgtatcgggtattcattctgtaaccagtaaggcaaccccgccagcctagccgggtcctcaacgacagg  
agcagcatcatgcgcacccgtggccaggaccaacgctgcccagatctgatcccgcaaatatacactcactataggagaccaca  
acggtttccctctagaataattttgttaactttaagaaggagatatacatatggctagcatgactggtggacagcaaatgggtcgggattcaag  
cttCATGGGTGCCGAAATCCCGAAAGAAATGCTGCGTGCTCAAACCAATGTCATCCTGC  
TGAATGTCCTGAAACAAGGCGATAACTATGTGTATGGCATTATCAAACAGGTGAAAG  
AAGCGAGCAACGGTGAAATGGAAGTGAATGAAGCCACCCTGTATACGATTTTTTGATC  
GTCTGGAACAGGACGGCATTATCAGCTCTTACTGGGGTGATGAAAGTCAAGGCGGTC  
GTCGCAAATATTACCGTCTGACCGAAATCGGCCATGAAAACATGCGCCTGGCGTTTCG  
AATCCTGGAGTCGTGTGGACAAAATCATTGAAAATCTGGAAGCAAACAAAAAATCTG  
AAGCGATCAAATCTAGAGGTGGCAGCGGTGGCCATCACCACCACCACCACCTGAg  
gatccactagtaacggcccgagtgctggaattctgcagatatccatcacactggcgccgctcgcagcagatccggctgtaacaaagcc  
cgaaaggaagctgagttggctgctgccaccgctgagcaataactagcataacccttggggcctctaacgggtcttgaggggtttttgctga  
aaggaggaactatattcggataattctgaagacgaaagggcctcgtgatacgcctattttataggttaatgtcatgataataatggttcttga  
cgtcagggtggcacttttccgggaaatgtgcgcggaaccctatttgttttttctaataacattcaaatatgtatccgctcatgagacaataacc  
tgataaatgcttcaataatattgaaaaaggaagatgagtaattcaacatttccgtgctgcccttattcccttttttgcggcatttgccttctgtttt  
gctcaccagaaacgctggtgaaagtaaaagatgctgaagatcagttgggtgcacgagtggtgtacatgaactggatctcaacagcggtaa  
gatccttgagagtttgcggccgaagaacgttttcaatgatgagcacttttaagttctgctatgtggcgcggtattatcccgtgtg

The sequence corresponding to the **UPPERCASE LETTERS** represents the LmrR protein.

## S2. Primers used in this study

| Name    | Primers                                            |
|---------|----------------------------------------------------|
| EKF     | GACGACGACGACAAGCATCACCACCACCACCACCA                |
| EKR     | TGCTTGTCGTCGTCGTCGCCACCGTGCCACCTCT                 |
| P1F     | TTAGCAACAGCACGGAACGTCATCACCACCACCACCACCA           |
| P1R     | GTTCCGTGCTGTTGCTAATATAGACCAGCTTGTCGTCGTCGTCGCC     |
| P2F     | caacgatcacagcgaaggtgcacatccgctCATCACCACCACCACCACCA |
| P2R     | cttcgctgtgatcggtgtgaaggagtacatCTTGTCGTCGTCGTCGCC   |
| P3F     | GGTACCATCTATTCCAAACATCACCACCACCACCACCA             |
| P3R     | TTTGAATAGATGGTACCCTTGTCGTCGTCGTCGCC                |
| P4F     | GGCGCAATGCTGGCAAAACATCACCACCACCACCACCA             |
| P4R     | TTTTGCCAGCATTGCGCCCTTGTCGTCGTCGTCGCC               |
| StopF   | ATCCGCGTgaCACCACCACCACCACCACTGA                    |
| StopR   | GTGGTGtcaACGCGGATGTGCACCTTCGCTGT                   |
| NHisF   | caccaccaccaccacGGTGCCGAAATCCCGAAA                  |
| NHisR   | gtggtggtggtggtggtCATGAAGCTTGAATCCCGACC             |
| P2N5?F  | CTCCTTCNNNAACGATCACAGCGAAGGTGCAC                   |
| P2N5?R  | GATCGTTNNNGAAGGAGTACATCTTGTCGTCGTCG                |
| P2N6?F  | CCTTCAACNNNGATCACAGCGAAGGTGCACAT                   |
| P2N6?R  | GTGATCNNGTTGAAGGAGTACATCTTGTCGTCG                  |
| P2H8?F  | CAACGATNNNAGCGAAGGTGCACATCCGCGTT                   |
| P2H8?R  | CTTCGCTNNNATCGTTGTTGAAGGAGTACATCTTGT               |
| P2R15AF | TCATCCGgcaTGACACCACCACCACCACCACT                   |
| P2R15AR | GGTGTCAtgcCGGATGAGCACCTCAGAGTGG                    |
| P3K6RF  | ATCTACAGCgcTGACACCACCACCACCACCA                    |
| P3K6RR  | TGTCAgcgGCTGTAGATCGTGCCCTTGTCGTC                   |
| P4K6RF  | ATGCTGGCAcgtTGACACCACCACCACCACCA                   |
| P4K6RR  | TGTCAacgTGCCAGCATGGCGCCCTTGTCGTC                   |

## S3. The resulting sequence of pET-17b(+)-LmrREKP2 plasmid

acgccgggcaagagcaactcggtcgccgcatacactattctcagaatgacttggtgagtactaccagtcacagaaaagcatcttacggatg  
gcatgacagtaagagaattatgcagtgctgccataaccatgagtataacactcgcccaacttactctgacaacgatcggaggaccgaag  
gagctaaccgctttttgcacaacatgggggatcatgtaactgccttgatggtgggaaccggagctgaatgaagccataccaaacgacgag  
cgtgacaccacgatgcctgcagcaatggcaacaacgttgcgcaactattaactggcgaactacttactctagcttcccggcaacaattaatag  
actggatggaggcggataaagttgcaggaccacttctgcctcgcccttccggctggctggtttattgctgataaatctggagccggtgagc  
gtgggtctcgcggtatcattgcagcactggggccagatggtaagccctccgctatcgtattatctacacgacggggagtcaggcaactatgg  
atgaacgaaatagacagatcgctgagataggtgcctcactgattaagcattggtaactgtcagaccaagttactcatatactttagattgattt  
aaaacttcatttttaattaaaaggatctaggtgaagatccttttgataatctcatgacaaaatccctaacgtgagtttctgctcactgagcgta  
gaccccgtagaaaagatcaaaggatcttcttgatcctttttctgcgcgtaactgtgctgctgcaaaaaaaaccaccgctaccagcggt  
ggtttgtttgccgcatcaagactaccaactcttttcgaaggtaactggcttcagcagagcgcagataccaataactgtccttctagtgtagcc  
gtagttaggccaccactcaagaactctgtagcaccgctacatacctcgctctgtaactctgttaccagtggtgctgcccagtggcgataagt  
cgtgtcttaccgggttgactcaagacgatgttaccggataaggcgcagcggtcgggctgaacggggggtctgtgcacagcccagctt  
ggagcgaacgacctacaccgaactgagatacctacagcgtgagctatgagaagcggccagctcccgaaggagaaaggcggacaggt  
atccggtgaagcggcagggtcggaacaggagagcgcagaggagctccagggggaaacgcctggtatctttatagctctgtcgggttctg

ccacctctgacttgagcgtcgatttttgtgatgctcgtcagggggcgagcctatggaaaaacgccagcaacgcggccttttacggttcctg  
gccttttctggccttttctcacatgttcttctgcgttatccccctgattctgtggataaccgtattaccgcctttgagtgagctgataccgctgc  
cgcagccgaacgaccgagcgcagcagtcagtgagcgcaggaagcggagagcgcctgatgcggatatttctccttacgcactgtgcggtg  
ttcacaccgcataatggtgcactctcagtacaatctgctctgatccgcatagttaagccagtatacactccgctatcgctacgtgactgggtc  
atggctgcgccccgacacccgccaacacccgctgacgcgcctgacgggcttctgctgctccggcatccgcttacagacaagctgtgaccg  
tctccgggagctgcatgtgtcagaggttttaccgtcatcaccgaaacgcgcgaggcagctgcggtaagctcatcagcgtggctgtgaagc  
gattcacagatgtctgcctgttaccgcgtcagctcgttgagtttctccagaagcgttaatgtctggcttctgataaagcgggcatgttaagg  
gcgggttttctgtttggtcactgatgcctccgtgaagggggatttctgttcatgggggtaatgataccgatgaaacgagagaggatgctcacg  
atacgggttactgatgatgaacatgcccgggttactggaacgttgtaggggtaacaactggcggatggatgcggcgggaccagagaaaaat  
cactcagggtcaatgccagcgttctgtaatacagatgtaggtgtccacagggtagccagcagcatcctgcgatgcagatccggaacataat  
ggtgcagggcgctgacttccgcgtttccagactttacgaaacacggaaccgaagaccattcatgttgttgcctcaggctgcagacgttttgcag  
cagcagtcgcttcacgttcgctcgcgtatcgggtattcattctgctaaccagtaaggcaaccccgccagcctagccgggtcctcaacgacagg  
agcagcatcatgcgcacccgtggccaggaccaacgctgcccgcagatcgcgatcccgcaatfaatacactcactatagggagaccaca  
acgggttccctctagaataattttgttaactttaagaaggagatatacatatggctagcatgactggtggacagcaaatgggtcgggattcaag  
cttCATGCACCACCACCACCACCGGTGCCGAAATCCCGAAAGAAATGCTGCGTGCTC  
AAACCAATGTCATCCTGCTGAATGTCCTGAAACAAGGCGATAACTATGTGTATGGCA  
TTATCAAACAGGTGAAAGAAGCGAGCAACGGTGAAATGGAAGTGAATGAAGCCACC  
CTGTATACGATTTTTTGATCGTCTGGAACAGGACGGCATTATCAGCTCTTACTGGGGTG  
ATGAAAGTCAAGGCGGTCTGTCGCAAATATTACCGTCTGACCGAAATCGGCCATGAAA  
ACATGCGCCTGGCGTTCGAATCCTGGAGTCGTGTGGACAAAATCATTGAAAATCTGG  
AAGCAAACAAAAAATCTGAAGCGATCAAATCTAGAGGTGGCAGCGGTGGCGACGAC  
GACGACAAGATGTACAGCTTCAACAACGACCATAGCGAAGGTGCACATCCTCGTtgaca  
ccaccaccaccaccactgaggtaccactagtaacggccgcagtgctggaattctgcagatatccatcacactggcgccgctcgcagca  
gatccggctgctaacaagcccgaaggaagctgagttggctgctgccaccgctgagcaataactagcataaccccttggggcctctaacg  
ggctctgaggggtttttgctgaaaggaggaactatatccgataattctgaagacgaaagggcctcgtgatacgcctattttataggttaatgt  
catgataataatggtttcttagacgtcaggtggcacttttcggggaaatgtgcgcggaaccctatttgttttttctaatacatcctaataatgtat  
ccgctcatgagacaataacccgtgataaatgcttcaataatattgaaaaaggaagagtatgagtattcaacatttcgctgctgcccttattcccttttt  
gcggcattttgccttctgttttctcaccagaaacgctgggtgaaagtaaaagatgctgaagatcagttgggtgcacgagtggttacatcga  
actggatctcaacagcggtgaagatccttgagagtttcccccgaagaacgtttccaatgatgagcacttttaagttctgctatgtggcgcggt  
attatcccgtgttg

The sequence corresponding to the **UPPERCASE LETTERS** represents the LmrREKP2 protein.

#### S4. Agarose gel electrophoresis analysis

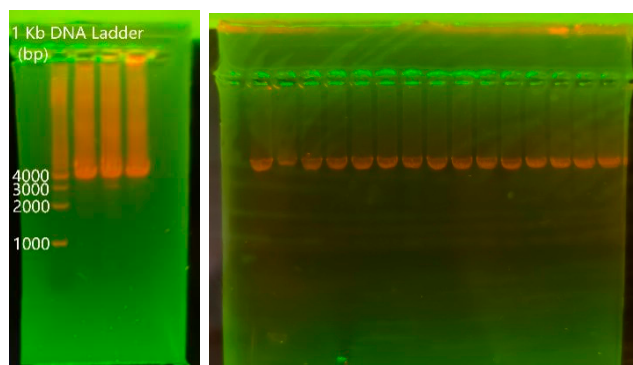

(a) The original and final plasmid results (b) Different mutated plasmids after saturation mutation

## S5. SDS-PAGE analysis

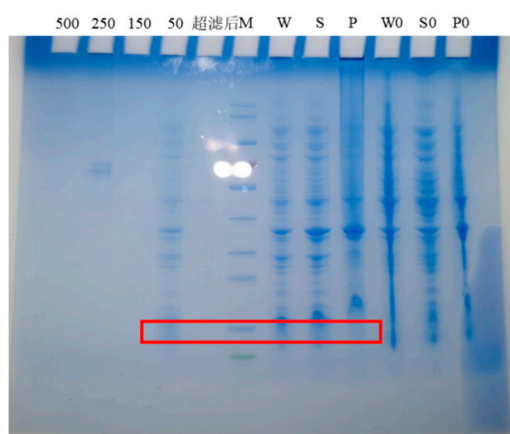

(a) C-terminus His-tagged fusion protein

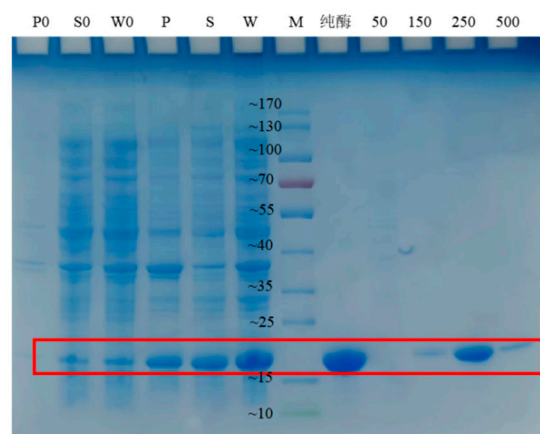

(b) N-terminus His-tagged fusion protein

M: Marker W: Whole-Cell Lysate P: Precipitate S: Supernatant 0: uninduced cell

50/150/250/500: 50/150/250/500 mM Imidazole buffer solution

超滤后: After ultrafiltration concentration 纯酶: pure enzyme

C-terminus His-tagged fusion protein could not be absorbed onto the Ni-NTA column, we introduced a new His-tag at the N-terminus of the original LmrR protein and removed His-tag from the C-terminus.

## S6. MS analysis of peptide2

M.W :1761.75

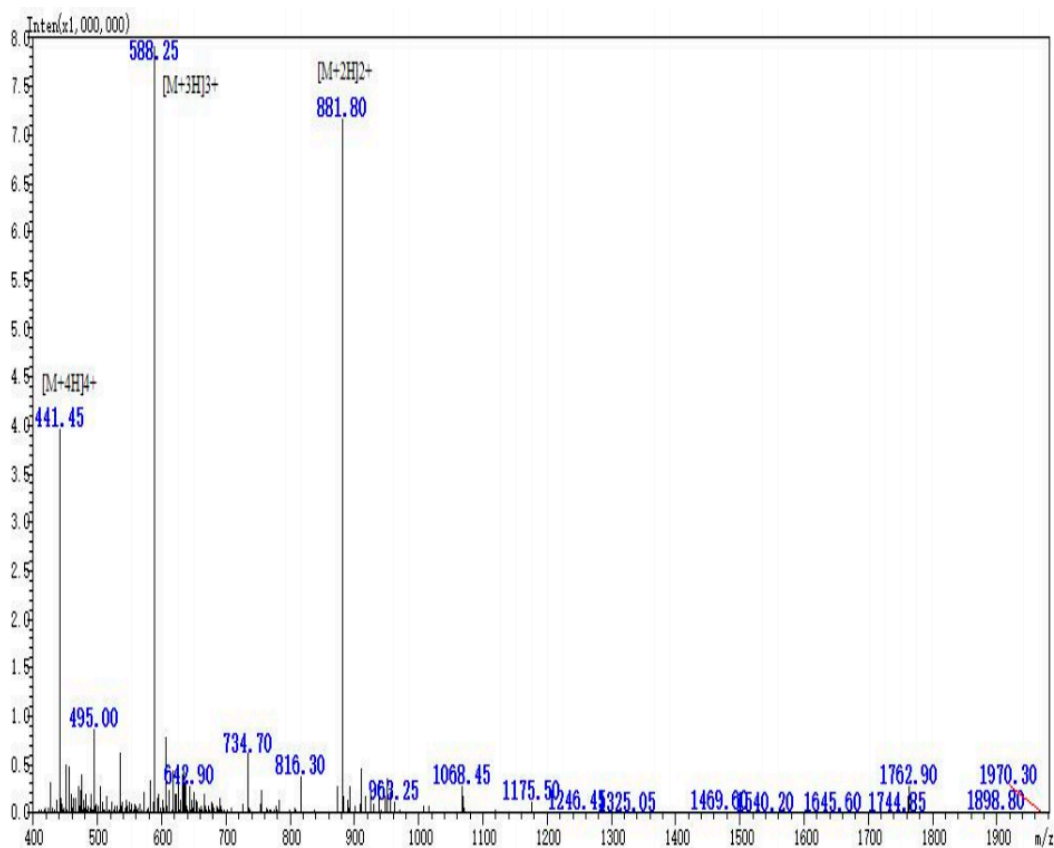

## S7. Chiral HPLC analysis

The enantiomeric excess was determined by HPLC (Daicel Chiralpak AD-H, hexane/isopropanol =

90:10, flow rate 1.2 mL/min,  $\lambda = 254\text{ nm}$ ),  $t_{R\text{major}} = 12.955\text{ min}$ ,  $t_{R\text{minor}} = 13.499\text{ min}$  (hexane/isopropanol = 95:5,  $t_{R\text{major}} = 25.518\text{ min}$ ,  $t_{R\text{minor}} = 26.719\text{ min}$ ). (Our chiral column has been used for a long time, and we have observed fluctuations in its performance, with retention times differing across batches.)

S7.1 aldol reaction product racemer

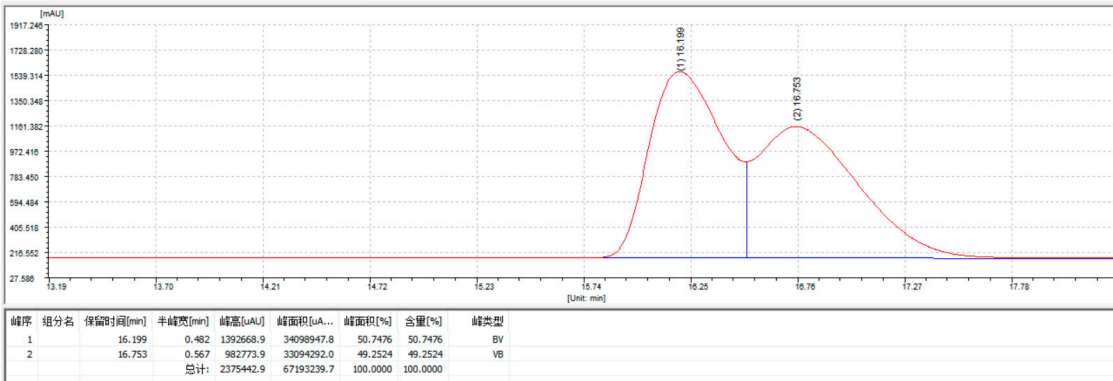

From left to right are: peak order, component name, retention time(min), half-peak height(uAU), peak height(uAU), peak area (uAU), peak area (%), content (%), and peak type.

S7.2 peptide MYSFNNDHSEGAHPR powder asymmetric catalysis(hexane/isopropanol = 95:5)

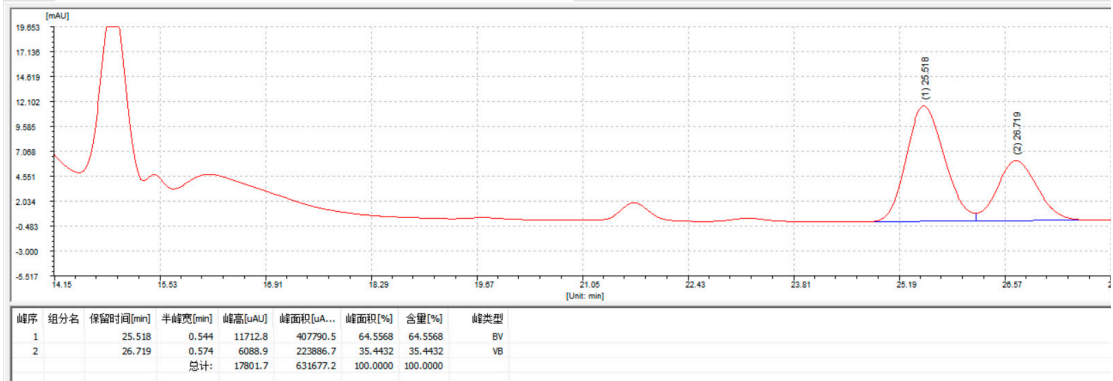

From left to right are: peak order, component name, retention time(min), half-peak height(uAU), peak height(uAU), peak area (uAU), peak area (%), content (%), and peak type.

S7.3 peptide MYSFINDHSEGAHPR asymmetric catalysis

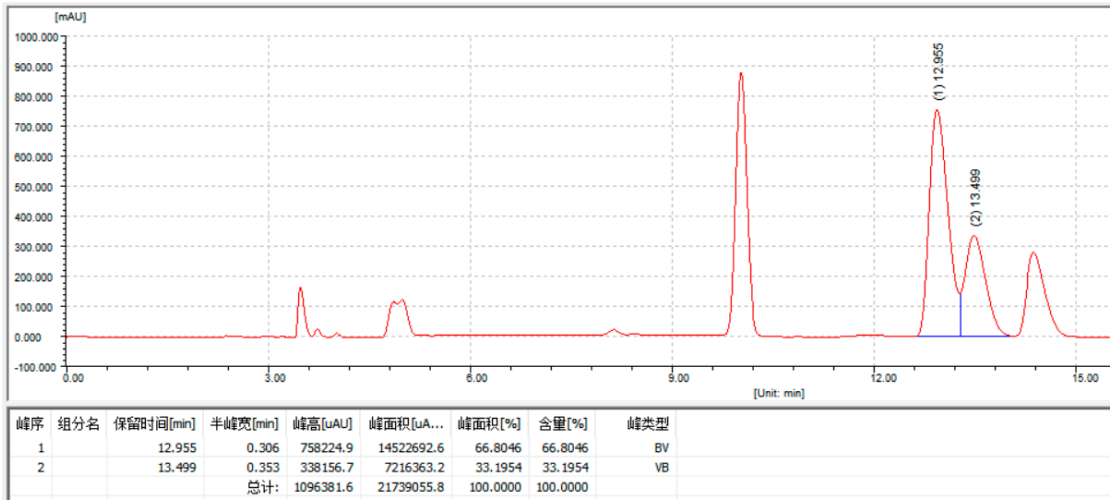

From left to right are: peak order, component name, retention time(min), half-peak height(uAU), peak height(uAU), peak area (uAU), peak area (%), content (%), and peak type.

S7.4 peptide MYSFINDHSEGAHPR asymmetric catalysis in DMSO

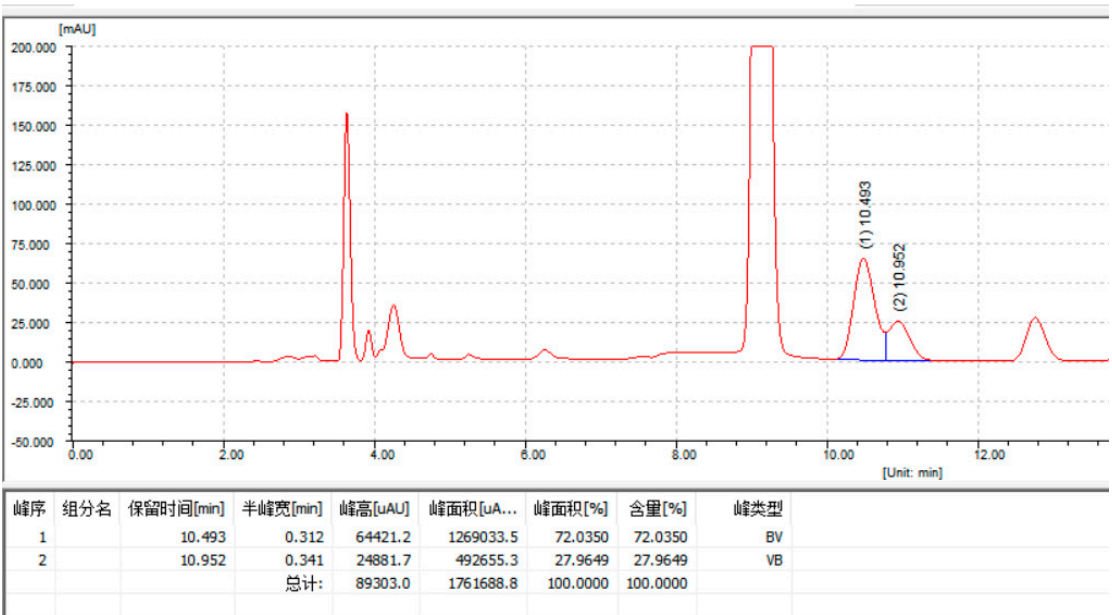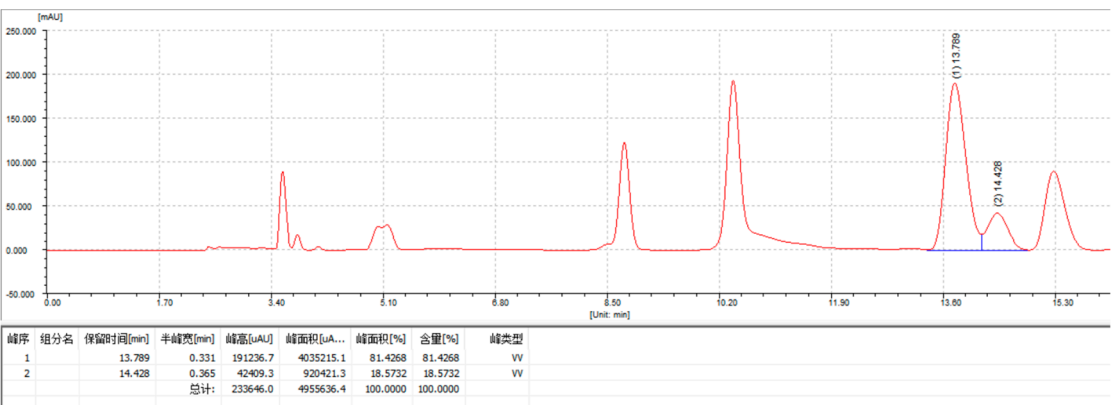

(Over 1 week)

From left to right are: peak order, component name, retention time(min), half-peak height(uAU), peak height(uAU), peak area (uAU), peak area (%), content (%), and peak type.

# S8. $^1\text{H}$ NMR analysis

4-hydroxy-4-(4-nitrophenyl) butan-2-one

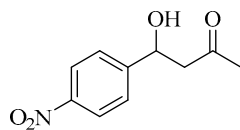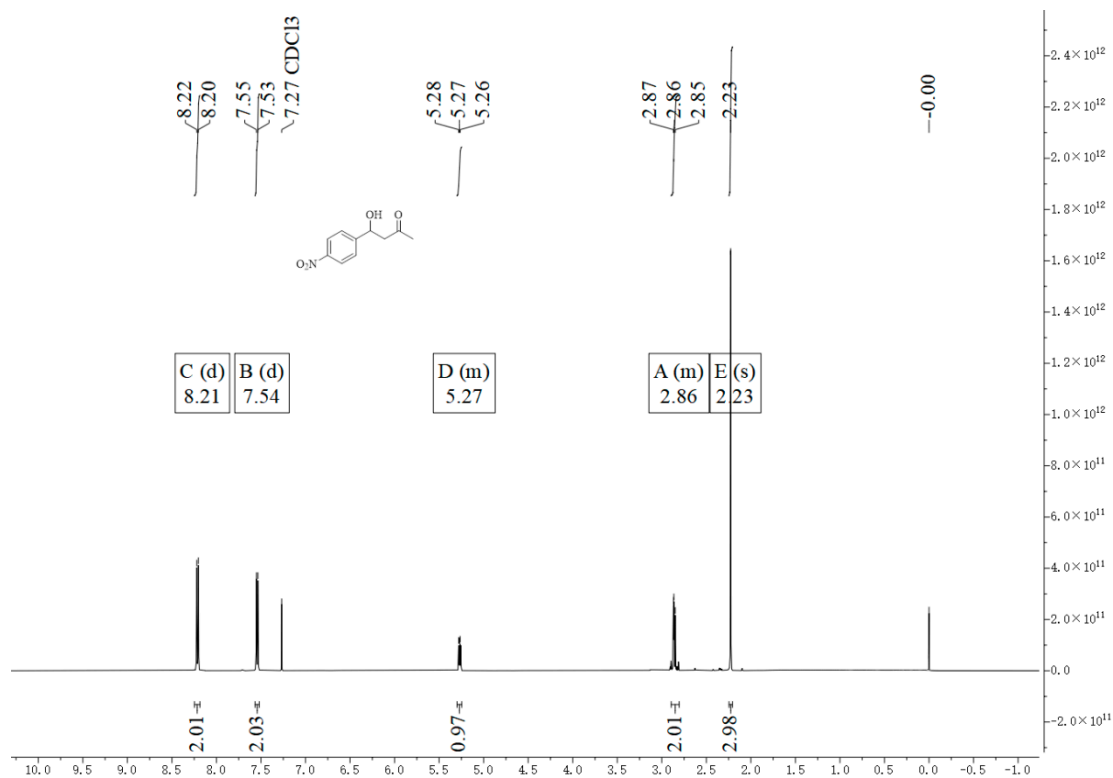

$^1\text{H}$  NMR (500 MHz,  $\text{CDCl}_3$ ):  $\delta$  8.21 (d,  $J$  = 8.7 Hz, 2H), 7.54 (d,  $J$  = 8.3 Hz, 2H), 5.30 – 5.25 (m, 1H), 2.89 – 2.80 (m, 2H), 2.23 (s, 3H).

S9. Some pictures documenting the process of the experiment.

S9.1 Fusion-protein precipitated by ammonium sulfate(yellow-white solid)

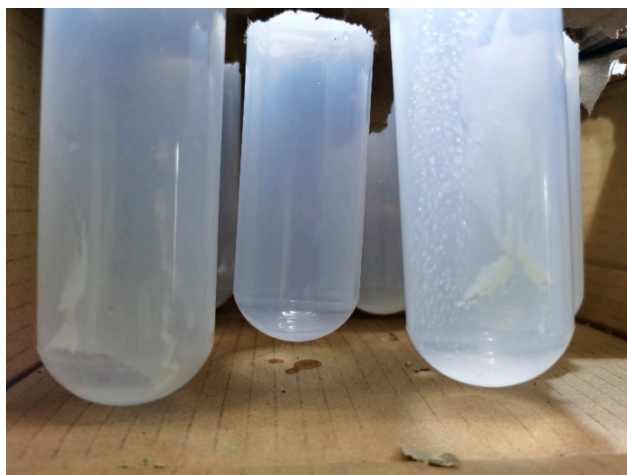



S9.2 Peptide powder before and after desalting (both freeze-dried)

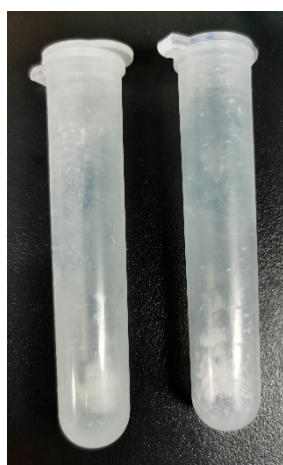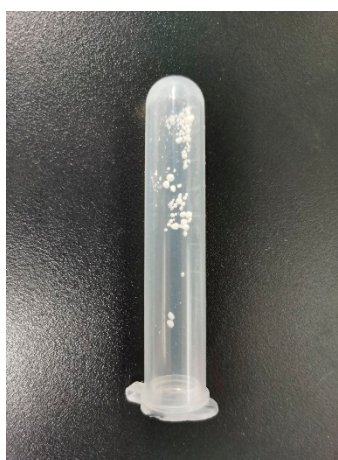

Supplement: s1 [file s1]
